# Supplementary material for: Fauna used in popular medicine in Northeast Brazil
Source: PubMed Central journal article supplement (PMC2628872; doi:10.1186/1746-4269-5-1), 2009-01-07
Supplement: 1746-4269-5-1-S1.pdf [file 1746-4269-5-1-S1.pdf]

**Additional file 1/Table 1 - Animal taxa recorded as having medicinal properties**

| Family / Species / local name                                                           | Conditions to which remedies are prescribed                                                                                                | References                |
|-----------------------------------------------------------------------------------------|--------------------------------------------------------------------------------------------------------------------------------------------|---------------------------|
| <b>CNIDARIANS</b>                                                                       |                                                                                                                                            |                           |
| <b>Mussidae</b>                                                                         |                                                                                                                                            |                           |
| <i>Mussismilia harttii</i> (Verril, 1868) <sup>NE/II</sup> -<br>"Coral branco"          | Vaginal discharge, diarrhoea                                                                                                               | 9,                        |
| <b>Physaliidae</b>                                                                      |                                                                                                                                            |                           |
| <i>Physalia physalia</i> (Linnaeus, 1758) -<br>Portuguese-man-of-war, "caravela"        | Asthma                                                                                                                                     | 11,13,14, 15              |
| <b>MOLLUSCS</b>                                                                         |                                                                                                                                            |                           |
| <b>Ampullariidae</b>                                                                    |                                                                                                                                            |                           |
| <i>Pomacea lineata</i> (Spix, 1827) - Snail, "aruá",<br>"caramujo"                      | Asthma, sprains, boils, ulcer                                                                                                              | 11, 13,14, 36, 37, 46, 57 |
| <b>Cassidae</b>                                                                         |                                                                                                                                            |                           |
| <i>Cassis tuberosa</i> (Linnaeus, 1758) - "Concha"                                      | Asthma                                                                                                                                     | 56                        |
| <b>Littorinidae</b>                                                                     |                                                                                                                                            |                           |
| <i>Littorina angulifera</i> (Lamarck, 1822) -<br>Periwinkle snail, "mela-pau"           | Chesty cough, shortness of breath                                                                                                          | 11,13,14                  |
| <b>Lucinidae</b>                                                                        |                                                                                                                                            |                           |
| <i>Lucina pectinata</i> (Gmelin, 1791) -<br>"Lambreta", "marisco redondo"               | Sexual impotence                                                                                                                           | 46                        |
| <b>Melongenidae</b>                                                                     |                                                                                                                                            |                           |
| <i>Pugilina morio</i> (Linnaeus, 1758) -<br>"Rochelo"                                   | Sexual impotence                                                                                                                           | 46                        |
| <b>Mytilidae</b>                                                                        |                                                                                                                                            |                           |
| <i>Mytella charruana</i> (Orbigny, 1842) -<br>Mussel, "marisco", "sururu"               | Ophthalmological problems                                                                                                                  | 56,                       |
| <i>Mytella guyanensis</i> Lamarck (1819) -<br>Mussel, "sururu"                          | Weakness                                                                                                                                   | 11,13,14,15               |
| <b>Ostreidae</b>                                                                        |                                                                                                                                            |                           |
| <i>Crassostrea rhizophorae</i> (Guilding, 1828) -<br>Mangrove oyster, "ostra do mangue" | Osteoporosis, pneumonia, stomach ache,<br>cancer, flu, weakness, pain relief in injuries<br>caused by the dorsal fin spine of a species of | 11,13,14, 15              |

|                                                                                                                |                                                                                                                                                |                      |
|----------------------------------------------------------------------------------------------------------------|------------------------------------------------------------------------------------------------------------------------------------------------|----------------------|
|                                                                                                                | catfish, anaemia, tuberculosis                                                                                                                 |                      |
| Strombidae                                                                                                     |                                                                                                                                                |                      |
| <i>Strombus puginis</i> Linnaeus, 1758 -<br>"Taquari"                                                          | Sexual impotence                                                                                                                               | 46                   |
| Teredinidae                                                                                                    |                                                                                                                                                |                      |
| <i>Teredo pedicellata</i> Quatrefages, 1849                                                                    | Tuberculosis                                                                                                                                   | 56                   |
| Vasidae                                                                                                        |                                                                                                                                                |                      |
| <i>Turbinella laevigata</i> (Anton, 1839) - "Tapu"                                                             | Sexual impotence                                                                                                                               | 46                   |
| Veneridae                                                                                                      |                                                                                                                                                |                      |
| <i>Anomalocardia brasiliiana</i> (Gmelin, 1791) -<br>Clam, "marisco"                                           | Asthma, flu, stomach ache                                                                                                                      | 11,13,14             |
| CRUSTACEANS                                                                                                    |                                                                                                                                                |                      |
| Calappidae                                                                                                     |                                                                                                                                                |                      |
| <i>Calappa ocellata</i> Holthuis, 1958 - "guajá"                                                               | Asthma, osteoporosis                                                                                                                           | 10                   |
| Gecarcinidae                                                                                                   |                                                                                                                                                |                      |
| <i>Cardisoma guanhumi</i> Latreille, 1825 <sup>NE/IN</sup> -<br>"Goiamum", "gaiamun"                           | Asthma, bronchitis, wounds, boils                                                                                                              | 52, 46               |
| Grapsidae                                                                                                      |                                                                                                                                                |                      |
| <i>Goniopsis cruentata</i> (Latreille, 1802) -<br>mangrove root crab, "aratu do mangue",<br>"caranguejo-aratu" | Epilepsy, venereal disease                                                                                                                     | 11,13,14, 56         |
| <i>Plagusia depressa</i> (Fabricius, 1775) -<br>"caranguejo-aratu"                                             | Epilepsy                                                                                                                                       | 56                   |
| Hippidae                                                                                                       |                                                                                                                                                |                      |
| <i>Emerita portoricensis</i> Schmitt, 1935                                                                     | Earache                                                                                                                                        | 56                   |
| Ocypodidae                                                                                                     |                                                                                                                                                |                      |
| <i>Ocypode quadrata</i> (JC Fabricius, 1787) -<br>Ghost crab, "maria farinha", "grauçá"                        | Asthma, haemorrhage in women, flu, asthma,<br>to alleviate the symptoms of intoxication<br>with poison of 'niquim' (Pisces,<br>Batrachoididae) | 11,13,14, 46, 50, 52 |
| <i>Ucides cordatus</i> (Linnaeus, 1763) <sup>DD/IN</sup> -<br>Land crab, "caranguejo-ucá"                      | Hemorrhage in women, incontinence,<br>osteoporosis, cough, asthma, tuberculosis,<br>womb disorders, arthrosis, bronchitis                      | 11,13,14, 46, 50, 52 |
| <i>Uca maracoani</i> (Latreille, 1802) - Fiddler                                                               | Asthma, whooping cough                                                                                                                         | 11,13,14             |

|                                                                                                  |                                                                                                                                                                                                                 |                                                             |
|--------------------------------------------------------------------------------------------------|-----------------------------------------------------------------------------------------------------------------------------------------------------------------------------------------------------------------|-------------------------------------------------------------|
| crab, “maracoani”                                                                                |                                                                                                                                                                                                                 |                                                             |
| Palaemonidae                                                                                     |                                                                                                                                                                                                                 |                                                             |
| <i>Macrobrachium carcinus</i> (Linnaeus, 1758) - “Pitu”                                          | Amnésia                                                                                                                                                                                                         | 56                                                          |
| <i>Macrobrachium acanthurus</i> (Wiegmann, 1836) - Cinnamon river shrimp, “camarão de água doce” | Irritation when milk teeth are erupting                                                                                                                                                                         | 11,13,14                                                    |
| <i>Macrobrachium borellii</i> (Nobili, 1896) - Freshwater shrimp, “camarão de água doce”         | Irritation when milk teeth are erupting                                                                                                                                                                         | 11,13,14                                                    |
| Penaeidae                                                                                        |                                                                                                                                                                                                                 |                                                             |
| <i>Xiphopenaeus schmitti</i> (Burkenroad, 1936), Southern white shrimp, “camarão branco”         | Irritation when milk teeth are erupting, skin spots                                                                                                                                                             | 13,14, 11,                                                  |
| <i>Xiphopenaeus kroyeri</i> (Heller, 1862) - Atlantic seabob, “camarão branco”                   | Irritation when milk teeth are erupting, skin spots                                                                                                                                                             | 11,13,14                                                    |
| Pseudosquillidae                                                                                 |                                                                                                                                                                                                                 |                                                             |
| <i>Cloridopsis dúbia</i> (H. M. Edwards, 1837) - “Barata-do-mar”                                 | Asthma                                                                                                                                                                                                          | 12,46, 48                                                   |
| Sesarmidae                                                                                       |                                                                                                                                                                                                                 |                                                             |
| <i>Aratus pisoni</i> (H. Milne Edwards, 1837) - Mangrove crab, “aratu preto”, “caranguejo-aratu” | Epilepsy, to alleviate the symptoms of intoxication with poison of <i>Colomesus psittacus</i> (a species of pufferfish)                                                                                         | 11,13,14, 56                                                |
| Trichodactylidae                                                                                 |                                                                                                                                                                                                                 |                                                             |
| <i>Trichodactylus fluviatilis</i> (Latreille, 1828) - caranguejo de água doce, freshwatercrab    | Asthma                                                                                                                                                                                                          | 54                                                          |
| Armadilloidea                                                                                    |                                                                                                                                                                                                                 |                                                             |
| <i>Armadillidium vulgare</i> (Latreille, 1804) - tatuzinho, pillbug                              | Asthma                                                                                                                                                                                                          | 61                                                          |
| INSECTS                                                                                          |                                                                                                                                                                                                                 |                                                             |
| Apidae                                                                                           |                                                                                                                                                                                                                 |                                                             |
| <i>Apis mellifera</i> (Linnaeus, 1758) - Africanised honey bee, “abelha italiana”                | Cough, flu, rheumatism, tuberculosis, bronchitis, hoarseness, ulcer, diabetes, verminosis, headache, giddiness, backache, wounds, burns, mumps, varicose veins, arthrosis, cellulitis, amoebiasis, sore throat, | 11,13,14, 15, 36, 37, 46, 47, 49, 51, 53, 57, 58, 60, 61,62 |

|                                                                             |                                                                                                                                                                                                                                                                                                                                                                  |                                                           |
|-----------------------------------------------------------------------------|------------------------------------------------------------------------------------------------------------------------------------------------------------------------------------------------------------------------------------------------------------------------------------------------------------------------------------------------------------------|-----------------------------------------------------------|
|                                                                             | ashtma, anaemia                                                                                                                                                                                                                                                                                                                                                  |                                                           |
| <i>Cephalotrigona capitata</i> (Smith, 1854) -<br>"Abelha papa-terra"       | Snake bite (antidote)                                                                                                                                                                                                                                                                                                                                            | 46, 47                                                    |
| <i>Frieseomelitta silvestrii</i> (Friese, 1902)                             | Flu                                                                                                                                                                                                                                                                                                                                                              | 47                                                        |
| <i>Frieseomelitta varia</i> (Lepeletier, 1836) -<br>Bee, Abelha moça branca | Flu                                                                                                                                                                                                                                                                                                                                                              | 60                                                        |
| <i>Melipona compressipes</i> (Fabricius, 1804) -<br>Stingless bee, "tiúba"  | Asthma, cough                                                                                                                                                                                                                                                                                                                                                    | 11,13,14, 15                                              |
| <i>Melipona mandacaia</i> Smith, 1863 - Bee                                 | Wounds                                                                                                                                                                                                                                                                                                                                                           | 45                                                        |
| <i>Melipona quadrifasciata</i> Lepeletier, 1836                             | Snake bite                                                                                                                                                                                                                                                                                                                                                       | 47,                                                       |
| <i>Melipona scutellaris</i> (Latreille, 1811) -<br>Stingless bee, "urucu"   | Headache, migraine, stroke, verminosis,<br>stomach ache, tuberculosis, haemorrhage<br>after delivery, cataracts, mycosis in the<br>mouth, flu, cancer, asthma, bronchitis,<br>intestinal disorders, cough, sexual impotence,<br>mycosis in the mouth; ophthalmological<br>problems, weakness, thrombosis, migraine,<br>amoebiasis, snake bite (antidote), rabies | 11,13,14,15, 36, 37, 41, 44, 45, 46, 47, 49, 53,<br>57,60 |
| <i>Melipona subnitida</i> (Ducke, 1910) -<br>"Jandaíra"                     | Flu, sore throat                                                                                                                                                                                                                                                                                                                                                 | 11,13,14, 15,51                                           |
| <i>Partamona cupira</i> - Stingless bee, "cupira"                           | Sore throat, swelling, headache, thrombosis,<br>stroke                                                                                                                                                                                                                                                                                                           | 46, 47, 60,62                                             |
| <i>Plebeia</i> cf. <i>emerina</i> Friese, 1900 -<br>"Mosquito remela"       | Mycosis in the mouth area                                                                                                                                                                                                                                                                                                                                        | 47                                                        |
| <i>Tetragonisca angustula</i> Latreille, 1811 -<br>"Abelha-jataí"           | Cataracts, sinusitis, cough, flu,<br>ophthalmological problems, sore throat                                                                                                                                                                                                                                                                                      | 11,13,14,15, 45,60                                        |
| <i>Trigona mosquito</i> Lutz, 1931 - Stingless bee                          | Cough                                                                                                                                                                                                                                                                                                                                                            | 53                                                        |
| <i>Trigona spinipes</i> (Fabricius, 1793) -<br>Stingless bee, "arapuá"      | Asthma, cough, flu, bronchitis, acne, diabetes,<br>strokes, thrombosis, migraine, itching, sore<br>throat, giddiness, weakness, scabies, fleas in<br>dogs, nasal congestion, to induce abortion,<br>whooping cough, irritation when milk teeth<br>are erupting, earache, epilepsy, shortness of<br>breath, late menstruation                                     | 12, 36, 37, 44, 45, 46, 47, 48, 49, 53, 57,58,60          |
| Blattidae                                                                   |                                                                                                                                                                                                                                                                                                                                                                  |                                                           |
| <i>Periplaneta americana</i> (Linnaeus, 1758) -                             | Heartburn, asthma, stomach ache, intestinal                                                                                                                                                                                                                                                                                                                      | 11,13,14, 44, 45, 46, 47, 53,60,61                        |

|                                                                                       |                                                                                                                                                                                                                                       |                  |
|---------------------------------------------------------------------------------------|---------------------------------------------------------------------------------------------------------------------------------------------------------------------------------------------------------------------------------------|------------------|
| American cockroach, "barata"                                                          | colic, earache, alcoholism, epilepsy, vomit, boil, haemorrhage, bronchitis, diarrhea, gonorrhoea, panaritis, cancer, stroke, burns, menstrual cramps, wounds, to suck a splinter out of skin or flesh, detoxification (alcohol abuse) |                  |
| Chrysomelidae                                                                         |                                                                                                                                                                                                                                       |                  |
| <i>Coraliomela brunnea</i> Thunberg, 1821 - "barata-de-coqueiro"                      | Epilepsy                                                                                                                                                                                                                              | 11, 15           |
| <i>Pachymerus</i> cf. <i>nucleorum</i> - "bicho-do-ouricuri"                          | Earache, stroke, swelling, wounds, seborrheic dermatitis, inflammation, thrombosis                                                                                                                                                    | 45, 46, 53       |
| Curculionidae                                                                         |                                                                                                                                                                                                                                       |                  |
| <i>Rhynchophorus palmarum</i> Linnaeus, 1758 - "bicudo", "broca-do-olho-coqueiro"     | Fever, headache, boils                                                                                                                                                                                                                | 9                |
| <i>Rhinostomus barbirostris</i> Fabricius, 1775 - "broca-do-estipe"                   | Fever, headache, boils                                                                                                                                                                                                                | 9                |
| Formicidae                                                                            |                                                                                                                                                                                                                                       |                  |
| <i>Atta cephalotes</i> (Linnaeus, 1758), Leaf-cutter ant, "tanajura"                  | Sore throat                                                                                                                                                                                                                           | 11,13,14, 62     |
| <i>Atta serdens</i> (Linnaeus, 1758) - Leaf-cutting, "saúva-ataí"                     | Stomach ache, heart diseases, chest palpitations                                                                                                                                                                                      | 53               |
| <i>Dinoponera quadriceps</i> (Santschi, 1921) - "Trinca cunhão"                       | Asthma                                                                                                                                                                                                                                | 11,13,14,15      |
| Gryllidae                                                                             |                                                                                                                                                                                                                                       |                  |
| <i>Acheta domesticus</i> (Linnaeus, 1758) - "Grilo"                                   | Scabies, asthma, eczema, lithiasis, earache, oliguresis, rheumatism, urine retention, children that urinate in bed and speak with lateness, incontinence urinary, ophthalmological problems                                           | 53               |
| Meloidae                                                                              |                                                                                                                                                                                                                                       |                  |
| <i>Palembus dermestoides</i> (Fairmaire, 1893) - Peanut beetle, "besouro-do-amendoim" | Sexual impotence, ophthalmological problems, rheumatism, weakness                                                                                                                                                                     | 46, 53           |
| Muscidae                                                                              |                                                                                                                                                                                                                                       |                  |
| <i>Musca domestica</i> (Linnaeus, 1758) - "Mosca comum"                               | Boil, baldness, eyesore, external sebaceous lamps, stye, spots in the face, ophthalmological problems, dermatosis, cysts                                                                                                              | 44, 46, 53,60,61 |

|                                                                                                                  |                                                                                                                                                                                                                   |                |
|------------------------------------------------------------------------------------------------------------------|-------------------------------------------------------------------------------------------------------------------------------------------------------------------------------------------------------------------|----------------|
| Psychidae                                                                                                        |                                                                                                                                                                                                                   |                |
| <i>Eurycotis manni</i> Rehn, 1916 - "Carocha"                                                                    | Headache                                                                                                                                                                                                          | 45             |
| <i>Oiketicus kirbyi</i> Guilding, 1827 - Case moth, "caixinha", "chocalho de cobra", "baia", "lagarta-encantada" | Asthma, earache, haemorrhage after delivery                                                                                                                                                                       | 53             |
| Termitidae                                                                                                       |                                                                                                                                                                                                                   |                |
| <i>Microcerotermes exignus</i> (Hagen, 1858), - Térmite, "cupim"                                                 | Asthma, bronchitis, flu, whopping cough                                                                                                                                                                           | 53             |
| <i>Nasutitermes macrocephalus</i> (Silvestri, 1903) - Termite, "cupim"                                           | catarrh                                                                                                                                                                                                           | 60, 62         |
| Vespidae                                                                                                         |                                                                                                                                                                                                                   |                |
| <i>Apoica pallens</i> (Oliv., 1791) - Paper wasp, "marimbondinho-chapéu", "eixu-chapéu"                          | Thrombosis, asthma, giddiness, nasal haemorrhage, haemorrhage after delivery, stroke, disorders after parturition (to accelerate recovery after parturition), ophthalmological problems, mumps, late menstruation | 45, 46, 47, 53 |
| <i>Brachygastra lecheguana</i> (Latreille, 1824) - "Inxu-verdadeiro", "marimbondinho-de-pote"                    | Cough, asthma                                                                                                                                                                                                     | 53             |
| <i>Polistes canadensis</i> (Linnaeus, 1758) - "Marimbondinho-santa-maria"                                        | Cough, whooping cough                                                                                                                                                                                             | 52, 46         |
| <i>Polybia sericea</i> (Olivier, 1791) - "Tarantantã"                                                            | Thrombosis                                                                                                                                                                                                        | 46, 47         |
| <i>Protopolybia exigua</i> (Saussure, 1854) - "Inxu-cachorro"                                                    | Evil eye, tobaccoism, ophthalmological problems                                                                                                                                                                   | 46, 47         |
| <i>Synoeca surinama</i> (Linnaeus, 1767) - Paper wasp, "marimbondinho-tatu"                                      | Asthma, shortness of breath                                                                                                                                                                                       | 53             |
| ECHINODERMS                                                                                                      |                                                                                                                                                                                                                   |                |
| Echinasteridae                                                                                                   |                                                                                                                                                                                                                   |                |
| <i>Echinaster brasiliensis</i> Müller & Troschel, 1842 - "Estrela-do-mar"                                        | Asthma                                                                                                                                                                                                            | 10, 12, 46     |
| <i>Echinaster echinophorus</i> Lamarck, 1816 - "Estrela-do-mar"                                                  | Asthma                                                                                                                                                                                                            | 46             |
| Echinometridae                                                                                                   |                                                                                                                                                                                                                   |                |
| <i>Echinometra lucunter</i> (Linnaeus, 1758) - "Pinaúna", "ouriço-do-mar"                                        | Asthma                                                                                                                                                                                                            | 10, 46, 50, 52 |
| Luidiidae                                                                                                        |                                                                                                                                                                                                                   |                |

|                                                                                                            |                                                                                                                                                                                      |                            |
|------------------------------------------------------------------------------------------------------------|--------------------------------------------------------------------------------------------------------------------------------------------------------------------------------------|----------------------------|
| <i>Luidia senegalensis</i> Lamarck, 1916 -<br>"Estrela-do-mar"                                             | Asthma, cough, metrorrhagia                                                                                                                                                          | 11,13,14,15, 46, 50, 52,61 |
| Mellitidae                                                                                                 |                                                                                                                                                                                      |                            |
| <i>Mellita sexiesperforata</i> (Leske, 1778) -<br>"Estrela-da-costa", "bolacha-da-praia"                   | Asthma, cough                                                                                                                                                                        | 56                         |
| Oreasteridae                                                                                               |                                                                                                                                                                                      |                            |
| <i>Oreaster reticulatus</i> (Linnaeus, 1758) -<br>Starfish, "estrela-do-mar"                               | Asthma                                                                                                                                                                               | 11,13,14, 15,60            |
| FISHES                                                                                                     |                                                                                                                                                                                      |                            |
| Auchenipteridae                                                                                            |                                                                                                                                                                                      |                            |
| <i>Trachelyopterus galeatus</i> (Linnaeus, 1766) -<br>- "Cumbá"                                            | Umbilical hernia, asthma, sexual impotence                                                                                                                                           | 36, 37, 46, 49, 57,58,61   |
| Anostomidae                                                                                                |                                                                                                                                                                                      |                            |
| <i>Schizodon knerii</i> (Steindachner, 1875) -<br>"Piau-branco"                                            | Leucoma, edema                                                                                                                                                                       | 57                         |
| Ariidae                                                                                                    |                                                                                                                                                                                      |                            |
| <i>Bagre bagre</i> (Linnaeus, 1766) - Coco sea<br>catfish, "bagre-fidalgo"                                 | Injuries caused by itself                                                                                                                                                            | 46, 50, 52                 |
| <i>Genidens barbatus</i> (Lacepède, 1803) - White<br>sea catfish, "bagre-do-mangue"                        | Pain relief caused in injuries by the species'<br>sting                                                                                                                              | 46, 52                     |
| <i>Genidens genidens</i> (Cuvier, 1829) - catfish,<br>"bagre"                                              | Injuries caused by itself                                                                                                                                                            | 42                         |
| <i>Sciadeichthys luniscutis</i> (Valenciennes,<br>1837) - "bagre-urutu"                                    | Pain relief caused in injuries by the species'<br>sting                                                                                                                              | 46, 52                     |
| Aspredinidae                                                                                               |                                                                                                                                                                                      |                            |
| <i>Aspredo aspredo</i> (Linnaeus, 1758) - Banjo<br>catfish, "banjo", "viola"                               | Asthma                                                                                                                                                                               | 11,13,14                   |
| <i>Aspredinichthys tibicen</i> (Valenciennes,<br>1840) - Tenbarbed banjo, "viola"                          | Asthma                                                                                                                                                                               | 11,13,14                   |
| Balistidae                                                                                                 |                                                                                                                                                                                      |                            |
| <i>Balistes vetula</i> (Linnaeus, 1758) <sup>VU</sup> - Queen<br>triggerfish, "cangulo", "capado", "peroá" | Stroke, asthma, thrombosis, earache, pain<br>relief caused in injuries by the species' sting,<br>haemorrhage, ascites, schistosomiasis,<br>appendicitis, menstrual cramps, gastritis | 11,13,14, 15, 46, 50, 52   |
| Batrachoididae                                                                                             |                                                                                                                                                                                      |                            |
| <i>Thalassophryne nattereri</i> (Steindachner,<br>1876) - Venomous toadfish, "niquim"                      | Pain relief caused in injuries by the species'<br>sting                                                                                                                              | 11,13,14, 46, 50, 52       |

|                                                                                                                                    |                                                                     |                |
|------------------------------------------------------------------------------------------------------------------------------------|---------------------------------------------------------------------|----------------|
| Callichthyidae                                                                                                                     |                                                                     |                |
| <i>Callichthys callichthys</i> (Linnaeus, 1758) – “cascarudo”, “caboge”                                                            | Asthma, umbilical hernia                                            | 46, 50, 52, 57 |
| Carcharhinidae                                                                                                                     |                                                                     |                |
| <i>Carcharhinus limbatus</i> (Müller & Henle, 1839) – Blackfin shark, “sucuri preto”                                               | Osteoporosis                                                        | 11,13,14       |
| <i>Carcharhinus porosus</i> (Ranzani, 1840) – Smalltail shark, “junteiro”, “cação-gaia-preta”                                      | Asthma, rheumatism, wounds, inflammations, osteoporosis, anaemia    | 11,13,14, 52   |
| <i>Galeocerdo cuvier</i> (Péron & Lesueur, 1822) – Tiger shark, “jaguara”                                                          | Osteoporosis                                                        | 11,13,14       |
| <i>Rhizoprionodon lalandii</i> (Müller & Henle, 1839) – Brazilian sharpnose shark, “cação”                                         | Rheumatism                                                          | 11,13,14       |
| <i>Rhizoprionodon porosus</i> (Poey, 1861) – Sharpnose shark, “cação”                                                              | Rheumatism                                                          | 11,13,14       |
| <i>Sphyrna lewini</i> (Griffith & Smith, 1834) <sup>IN</sup> – Scalloped hammerhead, “peixe-martelo”, “cação-panã”, “cação-chapéu” | Asthma, wounds, rheumatism, inflammation                            | 46, 50, 52     |
| Centropomidae                                                                                                                      |                                                                     |                |
| <i>Centropomus parallelus</i> Poey, 1860                                                                                           | Nephritis                                                           | 9              |
| <i>Centropomus undecimalis</i> (Bloch, 1792) – Common snook, “rubalão”                                                             | Edema in the legs                                                   | 46, 50, 52     |
| Characidae                                                                                                                         |                                                                     |                |
| <i>Astyanax bimaculatus</i> (Linnaeus, 1758) – Twospot astyanax, “piaba-mirim”, “machadinha”, “piaba chata”                        | Alcoholism, leishmaniosis, skin burns, wounds, rheumatism           | 46, 52         |
| <i>Brycon nattereri</i> Günther, 1864 – “pirapitinga”, “matrinchá”                                                                 | Flu                                                                 | 43             |
| Clupeidae                                                                                                                          |                                                                     |                |
| <i>Opisthonema oglinum</i> (Lesueur, 1818) – Atlantic thread herring, “sardinha”                                                   | Alcoholism                                                          | 11,13,14       |
| Dasyatidae                                                                                                                         |                                                                     |                |
| <i>Dasyatis guttata</i> (Bloch & Schneider, 1801) – Longnose stingray, “raia branca”                                               | Asthma, pain relief caused in injuries by the species’ sting, burns | 11,13,14       |
| <i>Dasyatis marianae</i> (Gomes, Rosa & Gadig, 2000) – Brazilian large-eyed stingray, “raia                                        | Asthma, pain relief caused in injuries by the species’ sting, burns | 11,13,14       |

|                                                                                            |                                                                                                                                                                                                                                                 |                                                 |
|--------------------------------------------------------------------------------------------|-------------------------------------------------------------------------------------------------------------------------------------------------------------------------------------------------------------------------------------------------|-------------------------------------------------|
| mariquita”                                                                                 |                                                                                                                                                                                                                                                 |                                                 |
| Doradidae                                                                                  |                                                                                                                                                                                                                                                 |                                                 |
| <i>Franciscodoras marmoratus</i> (Reinhardt, 1874) – “Urutu”                               | Injuries caused by itself                                                                                                                                                                                                                       | 9                                               |
| <i>Lithodoras dorsalis</i> (Valenciennes, 1840)                                            | Swelling                                                                                                                                                                                                                                        | 11,13,14                                        |
| Echeneidae                                                                                 |                                                                                                                                                                                                                                                 |                                                 |
| <i>Echeneis naucrates</i> Linnaeus, 1758 - Live sharksucker, “rêmora”, “pegador”           | Asthma, bronchitis                                                                                                                                                                                                                              | 46, 50, 52                                      |
| Electrophoridae                                                                            |                                                                                                                                                                                                                                                 |                                                 |
| <i>Electrophorus electricus</i> (Linnaeus, 1766) - Electric eel, “poraquê”                 | Sprains, bruises, insect bites, snake bite, asthma, flu, pain in general, muscle strain, rheumatism, osteoporosis, deafness, pneumonia, itching                                                                                                 | 11,12, 13,14, 15,46,48,61                       |
| Erythrinidae                                                                               |                                                                                                                                                                                                                                                 |                                                 |
| <i>Erythrinus erythrinus</i> (Bloch & Schneider, 1801) – “Matrôe”                          | Asthma                                                                                                                                                                                                                                          | 57                                              |
| <i>Hoplias malabaricus</i> (Bloch, 1794) - Trahira, “traíra”                               | Ophthalmological problems, rheumatism, cataracts, wounds, snake bite, conjunctivitis, stroke, thrombosis, asthma, toothache, fever, earache, diarrhoea, deafness, boils, bleedings, alcoholism, tetanus, sore throat, itching, sprains, leucoma | 11, 12, 13,14, 15, 42, 46, 48, 50, 52, 57,60,61 |
| <i>Hoplias lacerdae</i> Miranda Ribeiro, 1908 - Giant trahira                              | Leucoma                                                                                                                                                                                                                                         | 58                                              |
| Gadidae                                                                                    |                                                                                                                                                                                                                                                 |                                                 |
| <i>Gadus morhua</i> Linnaeus, 1758 <sup>VU</sup> – Atlantic cod, “bacalhau”                | Boils                                                                                                                                                                                                                                           | 50                                              |
| Ginglymostomatidae                                                                         |                                                                                                                                                                                                                                                 |                                                 |
| <i>Ginglymostoma cirratum</i> (Bonnaterre, 1788) <sup>DD</sup> - Nurse shark, “cação-lixá” | Rheumatism                                                                                                                                                                                                                                      | 11,13,14                                        |
| Heptapteridae                                                                              |                                                                                                                                                                                                                                                 |                                                 |
| <i>Pimelodella brasiliensis</i> (Steindachner, 1876) – “mandim”                            | Injuries caused by that fish species                                                                                                                                                                                                            | 43                                              |
| <i>Rhamdia quelen</i> (Quoy & Gaimard, 1824) – Mole, Catfish                               | Wekness                                                                                                                                                                                                                                         | 61                                              |
| Megalopidae                                                                                |                                                                                                                                                                                                                                                 |                                                 |

|                                                                                              |                                                                                                      |                      |
|----------------------------------------------------------------------------------------------|------------------------------------------------------------------------------------------------------|----------------------|
| <i>Megalops atlanticus</i> (Valenciennes, 1847) -<br>Tarpon, "camurupim", "cangurupim"       | Stroke, headache, asthma, shortness of<br>breath, thrombosis, chest pain, injuries<br>caused by bang | 11,13,14, 46, 52, 57 |
| Muraenidae                                                                                   |                                                                                                      |                      |
| <i>Gymnothorax funebris</i> Ranzani, 1840 -<br>Green moray, "moréia verde"                   | Bleeding (wounds)                                                                                    | 11,13,14             |
| <i>Gymnothorax moringa</i> (Cuvier, 1829) -<br>Spotted moray, "moréia pintada"               | Bleeding (wounds)                                                                                    | 11,13,14             |
| <i>Gymnothorax vicinus</i> (Castelnaud, 1855) -<br>Purplemouth moray, "moréia"               | Bleeding (wounds)                                                                                    | 11,13,14             |
| Myliobatidae                                                                                 |                                                                                                      |                      |
| <i>Aetobatus narinari</i> (Euphrasen, 1790) -<br>Spotted eagle ray, "raia- chita"            | Asthma, pain relief caused in injuries by the<br>species' sting, burns, haemorrhage                  | 11,13,14             |
| Narcinidae                                                                                   |                                                                                                      |                      |
| <i>Narcine brasiliensis</i> (Olfers, 1831) -<br>Brazilian electric ray, "raia elétrica"      | Toothache                                                                                            | 46, 50, 52           |
| Ogcocephalidae                                                                               |                                                                                                      |                      |
| <i>Ogcocephalus vespertilio</i> (Linnaeus, 1758) -<br>Batfish, "Peixe morcego"               | Asthma, bronchitis                                                                                   | 11,13,14             |
| Pimelodidae                                                                                  |                                                                                                      |                      |
| <i>Pseudoplatystoma corruscans</i> (Spix &<br>Agassiz, 1829) - Spotted sorubim,<br>"surubim" | Flu                                                                                                  | 43                   |
| Prochilodontidae                                                                             |                                                                                                      |                      |
| <i>Prochilodus argenteus</i> Spix & Agassiz, 1829<br>- "curimatá-pacú", "curimatá"           | To avoid swelling of the breast feeding,<br>mycosis                                                  | 43                   |
| Serrasalminidae                                                                              |                                                                                                      |                      |
| <i>Serrasalmus brandtii</i> (Lütken, 1875) -<br>White piranha, "pirambeba"                   | Inflammations, sexual impotence                                                                      | 42, 57, 61           |
| Sciaenidae                                                                                   |                                                                                                      |                      |
| <i>Cynoscion acoupa</i> (Lacepède, 1801) -<br>Acoupa weakfish, "pescada amarela"             | Renal failure                                                                                        | 11                   |
| <i>Cynoscion leiarchus</i> (Cuvier, 1830) -<br>Smooth weakfish, "pescada branca"             | Renal failure                                                                                        | 11                   |
| <i>Micropogonias furnieri</i> (Desmarest, 1823) -<br>Whitemouth croaker, "corvina"           | Pain relief caused in injuries by the species'<br>sting, cough, asthma, bronchitis                   | 46, 50, 52           |
| <i>Pachyurus francisci</i> (Cuvier, 1830) - San                                              | Asthma, urinary incontinence, backache                                                               | 43                   |

|                                                                 |                                                                                                                                                                                    |                                     |
|-----------------------------------------------------------------|------------------------------------------------------------------------------------------------------------------------------------------------------------------------------------|-------------------------------------|
| Francisco croaker, “cruvina-de-bico”                            |                                                                                                                                                                                    |                                     |
| Sparidae                                                        |                                                                                                                                                                                    |                                     |
| <i>Calamus penna</i> (Valenciennes, 1830) -                     | Asthma                                                                                                                                                                             | 46                                  |
| Sheepshead porgy, “peixe-pena”                                  |                                                                                                                                                                                    |                                     |
| Synbranchidae                                                   |                                                                                                                                                                                    |                                     |
| <i>Synbranchus marmoratus</i> Bloch, 1795 -                     | Bronchitis                                                                                                                                                                         | 46, 52                              |
| Marbled swamp eel, “muçum”                                      |                                                                                                                                                                                    |                                     |
| Syngnathidae                                                    |                                                                                                                                                                                    |                                     |
| <i>Hippocampus erectus</i> Perry, 1810 <sup>VU/II/IN</sup> -    | Asthma                                                                                                                                                                             | 11                                  |
| Horsefish, “cavalo-marinho”                                     |                                                                                                                                                                                    |                                     |
| <i>Hippocampus reidi</i> (Ginsburg, 1933) <sup>DD/II/IN</sup> - | Asthma, edema, bronchitis, haemorrhage, haemorrhage in women, disorders after parturition (to accelerate recovery after parturition), gastritis, tuberculosis, to prevent abortion | 11,12, 13,14,15, 46, 48, 50, 52, 60 |
| Longsnout seahorse, “cavalo-marinho”                            |                                                                                                                                                                                    |                                     |
| Tetraodontidae                                                  |                                                                                                                                                                                    |                                     |
| <i>Colomesus psittacus</i> (Bloch & Schneider, 1801) -          | Breast cancer, backache, warts                                                                                                                                                     | 11,13,14                            |
| Banded puffer, “baiacu”                                         |                                                                                                                                                                                    |                                     |
| <i>Sphoeroides testudineus</i> (Linnaeus, 1758) -               | Rheumatism                                                                                                                                                                         | 12, 46, 48                          |
| Checked puffer, “baiacu”                                        |                                                                                                                                                                                    |                                     |
| Trichiuridae                                                    |                                                                                                                                                                                    |                                     |
| <i>Trichiurus lepturus</i> Linnaeus, 1758 -                     | Asthma                                                                                                                                                                             | 11                                  |
| Largehead hairtail                                              |                                                                                                                                                                                    |                                     |
| Urolophidae                                                     |                                                                                                                                                                                    |                                     |
| <i>Urotrygon microphthalmum</i> (Delsman, 1941) -               | Asthma, pain relief caused in injuries by the species’ sting, burns                                                                                                                | 11,13,14                            |
| Smalleyed round stingray, “raia”                                |                                                                                                                                                                                    |                                     |
| AMPHIBIANS                                                      |                                                                                                                                                                                    |                                     |
| Bufonidae                                                       |                                                                                                                                                                                    |                                     |
| <i>Rhinella schneideri</i> (Werner, 1894) -                     | Urinary incontinence, dental caries, cancer, wounds, boils, erysipelas acne, to induce abortion                                                                                    | 46, 57                              |
| Cururu toad, “sapo cururu”                                      |                                                                                                                                                                                    |                                     |
| <i>Rhinella jimi</i> (Stevaux, 2002)                            | Gastritis, cancer                                                                                                                                                                  | 60                                  |
| Leptodactylidae                                                 |                                                                                                                                                                                    |                                     |
| <i>Leptodactylus cf. labyrinthicus</i> (Spix, 1824) -           | Earache, rheumatism, joint pain, cancer, sore throat                                                                                                                               | 46, 57                              |
| South american pepper frog, “jia-de-peito”, “rã- pimenta”       |                                                                                                                                                                                    |                                     |
| REPTILES                                                        |                                                                                                                                                                                    |                                     |

|                                                                                                        |                                                                                                                                                                                                                                                                                                                                                                                                                                                       |                                     |
|--------------------------------------------------------------------------------------------------------|-------------------------------------------------------------------------------------------------------------------------------------------------------------------------------------------------------------------------------------------------------------------------------------------------------------------------------------------------------------------------------------------------------------------------------------------------------|-------------------------------------|
| Gekkonidae                                                                                             |                                                                                                                                                                                                                                                                                                                                                                                                                                                       |                                     |
| <i>Hemidactylus mabouia</i> (Moreau de Jonnes, 1818) - Afro-American house gecko, "lagartixa", "briba" | Sore throat                                                                                                                                                                                                                                                                                                                                                                                                                                           | 11,13,14, 15                        |
| Iguanidae                                                                                              |                                                                                                                                                                                                                                                                                                                                                                                                                                                       |                                     |
| <i>Iguana iguana</i> (Linnaeus, 1758) <sup>DD/II</sup> - Common iguana, "camaleão"                     | Earache, erysipelas, asthma, rheumatism, edema, abscesses, joint pain, wounds, acne, athlete's foot, sore throat, swelling, burn, tumour, to suck a splinter out of skin or flesh, boil, injuries caused by the spines of the 'arraia' and others fishes, inflammation, hernia                                                                                                                                                                        | 11,13,14,15, 46, 47, 55, 57, 60, 62 |
| Teiidae                                                                                                |                                                                                                                                                                                                                                                                                                                                                                                                                                                       |                                     |
| <i>Ameiva ameiva</i> (Linnaeus, 1758) - Lizard, "sardão grande"                                        | Inflammation, dermatitis, venereal diseases, snake bites                                                                                                                                                                                                                                                                                                                                                                                              | 55, 57                              |
| <i>Cnemidophorus gr. ocellifer</i> (Spix, 1825) - Lizard, "sardão pequeno"                             | Inflammation, dermatitis, venereal diseases, snake bites                                                                                                                                                                                                                                                                                                                                                                                              | 55, 57                              |
| <i>Tupinambis merianae</i> (Duméril & Bibron, 1839) <sup>DD/II</sup> - Lizard, "tegu", "tejuacú"       | Earache, deafness, rheumatism, erysipelas, skin thorns and wounds, respiratory diseases, sore throat, snake bite, asthma, tumour, swelling, infection, bronchitis                                                                                                                                                                                                                                                                                     | 11,13,14, 15, 46, 49, 59, 60, 61,62 |
| <i>Tupinambis teguixin</i> (Linnaeus 1758) <sup>DD/II</sup> - Lizard, "tegu", "tejuacú"                | Sexual impotence, rheumatism, erysipelas, dermatitis, snake bites, asthma, tetanus, earache, thrombosis, wounds, panaris, swelling, herpes zoster, irritation when milk teeth are erupting, jaundice, inflammation, tumour, sore throat, infection, bronchitis, injuries caused by the spines of the 'arraia', pain relief in injuries caused by snake bites, toothache, suck a splinter out of skin or fresh, headache, cough, stroke, coarse throat | 11,13,14,15, 36, 37, 55             |
| Tropiduridae                                                                                           |                                                                                                                                                                                                                                                                                                                                                                                                                                                       |                                     |
| <i>Tropidurus hispidus</i> (Spix, 1825) - Lizard, "lagartixa", "catenga"                               | Alcoholism, dermatomycosis, warts, abscesses, boils, sore throat, erysipelas, healing of umbilical cord of newborn baby                                                                                                                                                                                                                                                                                                                               | 11,13,14, 15, 55                    |
| <i>Tropidurus semitaeniatus</i> (Spix, 1825) - Lizard, "lagartixa-de-lajedo"                           | Measles, asthma, alcoholism, dermatomycosis, warts                                                                                                                                                                                                                                                                                                                                                                                                    | 46, 57                              |

|                                                                                                         |                                                                                                                                                                                                                                                                                                                                                             |                                                       |
|---------------------------------------------------------------------------------------------------------|-------------------------------------------------------------------------------------------------------------------------------------------------------------------------------------------------------------------------------------------------------------------------------------------------------------------------------------------------------------|-------------------------------------------------------|
| <i>Tropidurus torquatus</i> (Wied, 1820) - Lizard, "lagartixa"                                          | Chicken pox                                                                                                                                                                                                                                                                                                                                                 | 44,58                                                 |
| <i>Uranoscodon superciliosus</i> (Linnaeus, 1758), "tamaquaré"                                          | As a sedative                                                                                                                                                                                                                                                                                                                                               | 11                                                    |
| Boidae                                                                                                  |                                                                                                                                                                                                                                                                                                                                                             |                                                       |
| <i>Boa constrictor</i> (Linnaeus, 1758) <sup>DD/II</sup> - Boa, "jibóia"                                | Rheumatism, lung disease, thrombosis, boils, tuberculosis, stomach ache, edema, snake bite, cancer, ache, swelling, to prevent abort, pain in the body, inflammation, athlete's foot, calluses, tumours, cracks in the sole of the feet, goitre, sore throat, arthrosis, insect sting, dog bite, erysipelas, thrombosis, asthma, neck strain, strain muscle | 11,13,14,15, 36,37, 39, 40, 46, 47, 49, 55, 57,61     |
| <i>Corallus caninus</i> (Linnaeus, 1758) <sup>DD/II</sup> - American emerald tree boa, "cobra papagaio" | Pain relief caused by sting of animals                                                                                                                                                                                                                                                                                                                      | 39, 40                                                |
| <i>Corallus hortolanus</i> (Linnaeus, 1758) <sup>DD/II</sup> - Snake                                    | To assist in removing spines or other sharp structures from the skin, rheumatism                                                                                                                                                                                                                                                                            | 11                                                    |
| <i>Eunectes murinus</i> (Linnaeus, 1758) <sup>DD/II</sup> - Anaconda, "sucurujú", "sucuri"              | Wounds, skin problems, bruises, sprains, arthrosis, rheumatism, boils, sexual impotence, headache, sore throat, thrombosis, swelling, tumour, asthma, muscle strain, numbness, syphilis, to reduce pain, luxation                                                                                                                                           | 11,13,14,15, 39, 46, 52,58,61                         |
| <i>Epicrates cenchria</i> (Linnaeus, 1758) <sup>DD/II</sup> - Brazilian rainbow boa, "salamanta"        | Rheumatism, pain in articulations, injuries caused by itself, sore throat                                                                                                                                                                                                                                                                                   | 11,13,14, 15, 57, 36, 37, 39, 40, 46, 49, 55,61       |
| Colubridae                                                                                              |                                                                                                                                                                                                                                                                                                                                                             |                                                       |
| <i>Leptophis ahetula</i> (Linnaeus, 1758) - Parrot snake, "cobra cipó"                                  | Pain relief caused by sting of animals                                                                                                                                                                                                                                                                                                                      | 11, 15, 39, 40                                        |
| <i>Mastigodryas bifossatus</i> (Raddi, 1820) - Rio tropical racer, "jaracuçu"                           | Snake bites                                                                                                                                                                                                                                                                                                                                                 | 55                                                    |
| <i>Oxyrhopus trigeminus</i> Duméril, Bibron & Duméril, 1854 - "Coral falsa"                             | Rheumatism                                                                                                                                                                                                                                                                                                                                                  | 11, 15, 40, 55                                        |
| <i>Spilotes pullatus</i> (Linnaeus, 1758) - Tiger snake                                                 | Pain relief in injuries caused by sting of insects and snake bite                                                                                                                                                                                                                                                                                           | 11,13                                                 |
| Crotalidae                                                                                              |                                                                                                                                                                                                                                                                                                                                                             |                                                       |
| <i>Crotalus durissus</i> (Linnaeus, 1758) <sup>DD/III</sup> -                                           | Asthma, snake bite, thrombosis, wounds,                                                                                                                                                                                                                                                                                                                     | 10, 11, 12, 13,14, 15, 36, 37, 39, 40,48, 49, 44, 46, |

|                                                                                                             |                                                                                                                                                                                                                                                                                                                |                          |
|-------------------------------------------------------------------------------------------------------------|----------------------------------------------------------------------------------------------------------------------------------------------------------------------------------------------------------------------------------------------------------------------------------------------------------------|--------------------------|
| Neotropical rattlesnake, "cascavel"                                                                         | luxation, rheumatism, pain in the legs, erysipelas, deafness, epilepsy, skin diseases, tuberculosis, hanseniasis, backache, tumour, boil, headache, earache, osteoporosis, sore throat, toothache, pain relief in injuries caused by sting of insects and snake bite, irritation when milk teeth are erupting, | 55, 58, 59, 60, 62       |
| Elapidae                                                                                                    |                                                                                                                                                                                                                                                                                                                |                          |
| <i>Micrurus ibiboboca</i> (Merrem, 1820) - "Cobra-coral"                                                    | Rheumatism, snake bite                                                                                                                                                                                                                                                                                         | 55                       |
| Viperidae                                                                                                   |                                                                                                                                                                                                                                                                                                                |                          |
| <i>Bothrops leucurus</i> Wagler, 1824 - Lance head, "jararaca"                                              | Tumour, boils                                                                                                                                                                                                                                                                                                  | 39                       |
| <i>Lachesis muta</i> (Linnaeus, 1766) - Bushmaster, "surucucu pico-de-jaca"                                 | Rheumatism, swelling, tumour, boil, pain relief in injuries caused by sting of insects and snake bite                                                                                                                                                                                                          | 11,13,14,15, 39,40, 55   |
| Chelidae                                                                                                    |                                                                                                                                                                                                                                                                                                                |                          |
| <i>Phrynops geoffroanus</i> (Schweigger, 1812) - Geoffroy's side-necked turtle, "cágado"                    | Asthma, sore throat, swelling, earache, rheumatism, arthrosis, healing of umbilical cord of newborn baby, mumps                                                                                                                                                                                                | 11,13,14, 15, 58, 60,62  |
| <i>Mesoclemmys tuberculata</i> (Luederwaldt, 1926) - Tuberculate toadhead turtle, "cágado", "cágado-d'água" | Rheumatism, discharge, thrombosis, bronchitis, diarrhoea, haemorrhag, asthma, sore throat, hoarseness                                                                                                                                                                                                          | 36, 37, 55, 57           |
| Cheloniidae                                                                                                 |                                                                                                                                                                                                                                                                                                                |                          |
| <i>Caretta caretta</i> (Linnaeus, 1758) <sup>VU/1/IB</sup> - Loggerhead turtle, "tartaruga cabeça"          | Injuries caused by bang, toothache, diabetes, headache, backache, wounds, cough, bronchitis, asthma, thrombosis, rheumatism, stroke, hoarseness, flu, backache, earache, sore throat, swelling                                                                                                                 | 11,13,14, 38, 46, 50, 52 |
| <i>Chelonia mydas</i> (Linnaeus, 1758) <sup>VU/1/IB</sup> - Green sea turtle, "tartaruga verde", "aruanã"   | Injuries caused by bang, toothache, diabetes, headache, backache, wounds, cough, bronchitis, asthma, flu, thrombosis, rheumatism, toothache, stroke, hoarseness, earache, sore throat, swelling, whooping cough, arthritis, erysipelas, boil, wounds, arthrosis, inflammation                                  | 11,13,14, 38,46, 50, 52  |
| <i>Eretmochelys imbricata</i> (Linnaeus,                                                                    | Injuries caused by bang, toothache, diabetes,                                                                                                                                                                                                                                                                  | 11,13,14, 38,46, 50, 52  |

|                                                                                                            |                                                                                                                                                                                                                                                                                                                                                                                |                                              |
|------------------------------------------------------------------------------------------------------------|--------------------------------------------------------------------------------------------------------------------------------------------------------------------------------------------------------------------------------------------------------------------------------------------------------------------------------------------------------------------------------|----------------------------------------------|
| 1766) <sup>EN/I</sup> - Atlantic hawksbill, “tartaruga de pente”                                           | headache, backache, wounds, cough, bronchitis, asthma, thrombosis, stroke, hoarseness, flu, rheumatism, earache, sore throat, swelling                                                                                                                                                                                                                                         |                                              |
| <i>Lepidochelys olivacea</i> (Eschscholtz, 1829) <sup>EM/I/IB</sup>                                        | Injuries caused by bang, toothache, diabetes, headache, backache, wounds, cough, flu, bronchitis, asthma, thrombosis, rheumatism, stroke, hoarseness                                                                                                                                                                                                                           | 46, 50, 52                                   |
| Dermochelyidae                                                                                             |                                                                                                                                                                                                                                                                                                                                                                                |                                              |
| <i>Dermochelys coriacea</i> (Vandelli, 1761) <sup>CR/I/IB</sup> - Leatherback turtle, “tartaruga de couro” | Rheumatism, earache, sore throat, swelling                                                                                                                                                                                                                                                                                                                                     | 11,13,14, 38                                 |
| Geoemydidae                                                                                                |                                                                                                                                                                                                                                                                                                                                                                                |                                              |
| <i>Rhinoclemmys punctularia</i> (Daudin, 1802) - Spot-legged turtle                                        | Wounds, tumour, erysipelas, earache, rheumatism                                                                                                                                                                                                                                                                                                                                | 11,13,14                                     |
| Testudinidae                                                                                               |                                                                                                                                                                                                                                                                                                                                                                                |                                              |
| <i>Chelonoidis carbonaria</i> (Spix, 1824) <sup>DD/II</sup> - Red-footed tortoise, “jabuti”                | Catarrh, erysipelas, bronchitis, to stop the sensation to getting thirsty, asthma                                                                                                                                                                                                                                                                                              | 11,12, 13,14, 15, 44, 46, 48, 61,62          |
| <i>Chelonoidis denticulata</i> (Linnaeus, 1766) <sup>VU/II</sup> - Yellow-footed tortoise, “jabuti”        | Sore throat, rheumatism, hernia, wounds, leishmaniosis, varicocele, earache                                                                                                                                                                                                                                                                                                    | 11,13,14,15,60                               |
| Alligatoridae                                                                                              |                                                                                                                                                                                                                                                                                                                                                                                |                                              |
| <i>Caiman crocodilus</i> (Linnaeus, 1758) <sup>II</sup> - Common cayman, “jacaré tinga”                    | Asthma, stroke, bronchitis, backache, earache, rheumatism, thrombosis, sexual impotence, snake bites (antidote), evil eye, irritation when milk teeth are erupting, discharge, swelling, scratch, athlete’s foot, ophthalmological problems, asthma, sore throat, amulet used as a protection against snake bite, rheumatism, hernia, prostate problems, infection, thrombosis | 11,12, 13,14, 37, 41, 46, 47, 48, 52, 55, 57 |
| <i>Caiman latirostris</i> (Daudin, 1801) <sup>II</sup> - Cayman, “jacaré-do-papo-amarelo”                  | Asthma, sore throat, amulet used as a protection against snake bite, rheumatism, irritation when milk teeth are erupting, hernia, prostate problems                                                                                                                                                                                                                            | 11,13,14,15, 37, 49,58,60,61                 |
| <i>Melanosuchus niger</i> (Spix, 1825) <sup>II</sup> - Black cayman, “jacare açú”                          | Thrombosis, infection, swelling, asthma, amulet used as a protection against snake bite, injuries caused by spines of the ‘arraia’, pain relief in injuries caused by snake bites                                                                                                                                                                                              | 11,13,14                                     |

|                                                                                                                             |                                                                                                                                                                                                                                                                             |                               |
|-----------------------------------------------------------------------------------------------------------------------------|-----------------------------------------------------------------------------------------------------------------------------------------------------------------------------------------------------------------------------------------------------------------------------|-------------------------------|
| <i>Paleosuchus palpebrosus</i> (Cuvier, 1807) <sup>II</sup> - Cayman, “jacaré coroa”, “jacaré”, “jacaré-preto”, “crocodilo” | Snake bite, asthma, stroke, rheumatism, thrombosis, backache, sexual impotence, edema, mycosis, evil eye, irritation when milk teeth are erupting, snake bite (antidote), discharge, sore throat, amulet used as a protection against snake bite, hernia, prostate problems | 11,13,14, 15, 46, 49, 52,58   |
| <b>BIRDS</b>                                                                                                                |                                                                                                                                                                                                                                                                             |                               |
| <b>Anatidae</b>                                                                                                             |                                                                                                                                                                                                                                                                             |                               |
| <i>Anser anser</i> (Linnaeus, 1758). - Greylag goose, “ganso”                                                               | Laryngitis, pharyngitis, tonsillitis                                                                                                                                                                                                                                        | 57, 60                        |
| <b>Anhimidae</b>                                                                                                            |                                                                                                                                                                                                                                                                             |                               |
| <i>Anhima cornuta</i> (Linnaeus, 1766) - Horned screamer, “anuhma”                                                          | Intoxication from poisonous animals                                                                                                                                                                                                                                         | 9                             |
| <b>Ardeidae</b>                                                                                                             |                                                                                                                                                                                                                                                                             |                               |
| <i>Ardea cocoi</i> (Linnaeus, 1766) - White-necked Heron                                                                    | Swelling, inflammation, injuries caused by the spines of the ‘arraia’ and others fishes, asthma, boil, tumour, inflammation, rheumatism, earache                                                                                                                            | 11, 13                        |
| <i>Ardea alba</i> Linnaeus, 1758 - Galça                                                                                    | Bronchitis, pneumony                                                                                                                                                                                                                                                        | 58                            |
| <i>Tigrisoma lineatum</i> (Boddaert, 1783) - socó, Rufescent Tiger-Heron                                                    | Bronchitis,pneumony                                                                                                                                                                                                                                                         | 58                            |
| <b>Psittacidae</b>                                                                                                          |                                                                                                                                                                                                                                                                             |                               |
| <i>Amazona aestiva</i> (Linnaeus, 1758)                                                                                     | Asthma                                                                                                                                                                                                                                                                      |                               |
| <b>Cathartidae</b>                                                                                                          |                                                                                                                                                                                                                                                                             |                               |
| <i>Coragyps atratus</i> (Bechstein, 1793) - Black vulture, “urubu”, “urubu-preto”                                           | Deafness, bronchitis, anaemia, alcoholism, asthma, flu (catarrh), earache                                                                                                                                                                                                   | 11,13,14, 15, 57, 58,60,61,62 |
| <b>Cracidae</b>                                                                                                             |                                                                                                                                                                                                                                                                             |                               |
| <i>Penelope jacucaca</i> (Spix, 1825) <sup>VU/IB</sup> - White-browed guan, “jacu”                                          | Insomnia                                                                                                                                                                                                                                                                    | 46                            |
| <i>Penelope superciliaris</i> Temminck, 1815 - Rusty-margined Guan                                                          | Asthma                                                                                                                                                                                                                                                                      | 61                            |
| <b>Ciconidae</b>                                                                                                            |                                                                                                                                                                                                                                                                             |                               |
| <i>Ciconia maguari</i> (Gmelin, 1789) - Maguari stork                                                                       | Injuries caused by the spines of the ‘arraia’ and others fishes, thrombosis                                                                                                                                                                                                 | 11, 13                        |
| <b>Columbidae</b>                                                                                                           |                                                                                                                                                                                                                                                                             |                               |

|                                                                                    |                                                                                                                                                                                                                                                                  |                                                                       |
|------------------------------------------------------------------------------------|------------------------------------------------------------------------------------------------------------------------------------------------------------------------------------------------------------------------------------------------------------------|-----------------------------------------------------------------------|
| <i>Leptotila rufaxilla</i> (Richard & Bernard, 1792) – Gray-fronted dove, ‘jurití’ | Thrombosis                                                                                                                                                                                                                                                       | 46                                                                    |
| <i>Columba livia</i> (Gmelin, 1789) – Rock pigeon, “pombo”                         | Asthma, laryngitis, pharyngitis, tonsillitis                                                                                                                                                                                                                     | 57                                                                    |
| Corvidae                                                                           |                                                                                                                                                                                                                                                                  |                                                                       |
| <i>Cyanocorax cyanopogon</i> (Wied, 1821) – White-naped jay, “can-can”             | Asthma                                                                                                                                                                                                                                                           | 46,58, 60,62                                                          |
| Cuculidae                                                                          |                                                                                                                                                                                                                                                                  |                                                                       |
| <i>Crotophaga ani</i> Linnaeus, 1758 – Smooth-billed ani                           | Bronchitis, thrombosis, asthma, whooping cough                                                                                                                                                                                                                   | 11,13, 15, 57,58                                                      |
| <i>Guira guira</i> (Gmelin, 1788) – Guira cuckoo, “anum branco”                    | Asthma                                                                                                                                                                                                                                                           | 57                                                                    |
| Charadriidae                                                                       |                                                                                                                                                                                                                                                                  |                                                                       |
| <i>Vanellus chilensis</i> (Molina, 1782) – Southern lapwing, “quero-quero”         | To stay awake                                                                                                                                                                                                                                                    | 44, 46                                                                |
| Emberezidae                                                                        |                                                                                                                                                                                                                                                                  |                                                                       |
| <i>Coereba flaveola</i> (Linnaeus, 1758) – Bananaquit, “caga-sebo”                 | Thrombosis                                                                                                                                                                                                                                                       | 46                                                                    |
| Furnariidae                                                                        |                                                                                                                                                                                                                                                                  |                                                                       |
| <i>Furnarius rufus</i> (Gmelin, 1788) – Rufous hornero, “maria-barreira”           | Mumps                                                                                                                                                                                                                                                            | 52                                                                    |
| Meleagrididae                                                                      |                                                                                                                                                                                                                                                                  |                                                                       |
| <i>Meleagris gallopavo</i> Linnaeus, 1758 – turkey, “peru”                         | Asthma                                                                                                                                                                                                                                                           | 11,13,14, 59,62                                                       |
| Phasianidae                                                                        |                                                                                                                                                                                                                                                                  |                                                                       |
| <i>Gallus gallus</i> (Linnaeus, 1758) – Domestic chicken, “galinha”                | Catarrh, fever, warts, haemorrhage, bronchitis, nasal congestion, flu, skin thorns and wounds, asthma, sore throat, tumour, poor digestion, healing of umbilical cord of newborn baby, swelling, cough, tuberculosis, earache, tonsillitis, rheumatism, diarrhea | 11,12, 13,14,15, 37, 37, 44, 46, 47, 48, 49, 52, 57, 58, 59, 60,61,62 |
| <i>Pavo cristatus</i> Linnaeus, 1758 – Indian peafowl                              | Thrombosis, epilepsy                                                                                                                                                                                                                                             | 42,60                                                                 |
| Rallidae                                                                           |                                                                                                                                                                                                                                                                  |                                                                       |
| <i>Aramides cajanea</i> (Statius Muller, 1776) – Grey-necked wood-rail, “saracura” | Evil eye                                                                                                                                                                                                                                                         | 46                                                                    |
| Numididae                                                                          |                                                                                                                                                                                                                                                                  |                                                                       |

|                                                                                                 |                                                                                                                                                                            |                         |
|-------------------------------------------------------------------------------------------------|----------------------------------------------------------------------------------------------------------------------------------------------------------------------------|-------------------------|
| <i>Numida meleagris</i> Linnaeus, 1758 - Helmeted Guineafowl, "Guiné"                           | Pertussis                                                                                                                                                                  | 60                      |
| Struthionidae                                                                                   |                                                                                                                                                                            |                         |
| <i>Struthio camelus</i> Linnaeus, 1766 - Common Ostrich, "Avestruz"                             | Osteoporosis                                                                                                                                                               | 60                      |
| Rheidae                                                                                         |                                                                                                                                                                            |                         |
| <i>Rhea americana</i> (Linnaeus, 1758) <sup>ii</sup> - Greater rhea, "ema"                      | General aches, rheumatism, thrombosis, strokes                                                                                                                             | 11, 12, 15, 44, 46,48   |
| Tinamidae                                                                                       |                                                                                                                                                                            |                         |
| <i>Crypturellus noctivagus</i> (Wied, 1820) <sup>VU/IB</sup> - Yellow-legged tinamou, "zabele"  | Thrombosis, stroke                                                                                                                                                         | 44, 46,58,61            |
| <i>Nothura boraquira</i> (Spix, 1825) - White-bellied nothura, 'codorna"                        | Thrombosis, stroke                                                                                                                                                         | 44, 46,59,61            |
| <i>Nothura maculosa</i> (Temminck, 1815) - Spotted Nothura English, Codorniz                    | Snake bite                                                                                                                                                                 | 60,62                   |
| <i>Rhynchotus rufescens</i> (Temminck, 1815) - Red-winged tinamou, "perdiz"                     | Snake bite, thrombosis, snake bites (antidote),                                                                                                                            | 46, 49,61               |
| Trochilidae                                                                                     |                                                                                                                                                                            |                         |
| <i>Eupetomena macroura</i> (Gmelin, 1788) - Swallow-tailed hummingbird, "beijola", "beija-flor" | Cardiopathies, asthma, flu, ache                                                                                                                                           | 57                      |
| Tyrannidae                                                                                      |                                                                                                                                                                            |                         |
| <i>Fluvicola nengeta</i> (Linnaeus, 1766) - Masked water-tyrant, "lavandeira"                   | Boils                                                                                                                                                                      | 57                      |
| <i>Pitangus sulphuratus</i> (Linnaeus, 1766) - Great Kiskadee, bem-te-vi                        | Earache                                                                                                                                                                    | 61                      |
| Cotingidae                                                                                      |                                                                                                                                                                            |                         |
| <i>Procnias nudicollis</i> (Vieillot, 1817), araponga, bare-throated Bellbird                   | Tuberculosis                                                                                                                                                               | 58                      |
| MAMMALS                                                                                         |                                                                                                                                                                            |                         |
| Agoutidae                                                                                       |                                                                                                                                                                            |                         |
| <i>Agouti paca</i> (Linnaeus, 1766) <sup>iii</sup> - Spotted paca, "paca"                       | Wound in the breast caused by suckling, ophthalmological problems, stomach disorders, pterygium, to suck a splinter out of skin or flesh, injuries caused by the spines of | 11,13,14, 15, 46, 57,61 |

|                                                                                              |                                                                                                                                                                                                                                                                    |                                                   |
|----------------------------------------------------------------------------------------------|--------------------------------------------------------------------------------------------------------------------------------------------------------------------------------------------------------------------------------------------------------------------|---------------------------------------------------|
|                                                                                              | 'arraia', control cholesterol level                                                                                                                                                                                                                                |                                                   |
| Balaenopteridae                                                                              |                                                                                                                                                                                                                                                                    |                                                   |
| <i>Balaenoptera acutorostrata</i> Lacépède, 1804<br>I – Minke whale, "baleia minke"          | Rheumatism, sore throat, wounds                                                                                                                                                                                                                                    | 11,13,14, 15                                      |
| Bovidae                                                                                      |                                                                                                                                                                                                                                                                    |                                                   |
| <i>Bos taurus</i> Linnaeus, 1758 – Cow, "vaca"                                               | Thrombosis, evil eye, amulet used as a protection against snake bite, baldness, sexual impotence, measles, varicella, anaemia, whooping cough, alcoholism, rheumatism, inflammation, asthma, cough, sore throat, wounds, cracks in the sole of the feet, dizziness | 10, 11,13,14,15, 44, 46, 47, 57, 58, 59, 60,61,62 |
| <i>Bubalus bubalis</i> (Linnaeus, 1758) – Water buffalo (feral), "búfalo"                    | Rheumatism, osteoporosis, thrombosis                                                                                                                                                                                                                               | 11,15                                             |
| <i>Ovis aries</i> (Linnaeus, 1758) – Sheep, "carneiro"                                       | Edema, fractures, erysipelas, herpes zoster, backache, swelling, to assist children who take longer than usual to start walking, arthritis, arthrosis, rheumatism, muscle strain, inflammation, luxation, cracks in the sole of the feet, joint pain               | 10, 11,13,14, 15, 44, 46, 47 57, 59, 60,61,62     |
| <i>Capra hircus</i> Linnaeus, 1758 – Domestic goat, "bode"                                   | Evil eye, snake bite, muscle strain                                                                                                                                                                                                                                | 46 ,46,59                                         |
| Bradyrodidae                                                                                 |                                                                                                                                                                                                                                                                    |                                                   |
| <i>Bradypus variegatus</i> Shinz, 1825 – Brown-throated three-toed sloth, "Preguiça pequena" | Thrombosis                                                                                                                                                                                                                                                         | 11,15,57                                          |
| Canidae                                                                                      |                                                                                                                                                                                                                                                                    |                                                   |
| <i>Canis lupus</i> (Linnaeus, 1758) – Domestic dog, "cachorro"                               | Chicken pox, mumps, smallpox, asthma, varicella, measles, menstrual cramps                                                                                                                                                                                         | 11,13,14, 44, 46, 57,58,61                        |
| <i>Cerdocyon thous</i> (Linnaeus, 1766) II – Crab-eating fox, "raposa"                       | Rheumatism, flu, haemorrhoids, disorders after parturition (to accelerate recovery after parturition)                                                                                                                                                              | 11,13,14, 15, 59, 60,61,62                        |
| <i>Chrysocyon brachyurus</i> (Illiger, 1815) II/IB – Maned wolf, "lobo-guará"                | Epilepsy                                                                                                                                                                                                                                                           | 36, 37, 46                                        |
| <i>Dusicyon thous</i> – Linnaeus, 1766 – Crab-eating fox, "raposa"                           | Alcoholism, thrombosis, rheumatism, ophthalmological problems, diabetes, urinary infection                                                                                                                                                                         | 57                                                |

|                                                                                                                |                                                                                                                                                                |                           |
|----------------------------------------------------------------------------------------------------------------|----------------------------------------------------------------------------------------------------------------------------------------------------------------|---------------------------|
| Caviidae                                                                                                       |                                                                                                                                                                |                           |
| <i>Cavia aperea</i> Erxleben, 1777 – “Preá”                                                                    | Inflammation                                                                                                                                                   | 57, 62                    |
| <i>Kerodon rupestris</i> (Wied-Neuwied, 1820) – “Mocó”                                                         | Constipation                                                                                                                                                   | 46,60                     |
| Cebidae                                                                                                        |                                                                                                                                                                |                           |
| <i>Alouatta belzebul</i> (Linnaeus, 1766) <sup>CR/IB</sup> – Red-handed howler monkey, “guariba”, “macaco”     | Whooping cough, sore throat, asthma                                                                                                                            | 11,13                     |
| <i>Cebus apella</i> (Linnaeus, 1758) <sup>II</sup> – Brown capuchin, “capuchin”, “macaco”, “macaco-prego”      | Insect sting                                                                                                                                                   | 11,13,14,15               |
| Cervidae                                                                                                       |                                                                                                                                                                |                           |
| <i>Blastocerus dichotomus</i> (Illiger, 1815) <sup>VU/I/IB</sup> – Marsh deer, “cervo-do-pantanal”             | Diarrhoea, vomit                                                                                                                                               | 9                         |
| <i>Mazama americana</i> (Erxleben, 1777) <sup>DD/III</sup> – Red brocket, “veado gaedo”                        | Stroke                                                                                                                                                         | 44                        |
| <i>Mazama cf. gouazoupira</i> (G. Fischer, 1814) – Gray brocket, “veado-catingueiro”                           | Asthma, edema, rheumatism, snake bite, thrombosis, to assist children who take longer than usual to start walking, toothache, wounds, sprains                  | 12, 46, 48, 57            |
| Dasypodidae                                                                                                    |                                                                                                                                                                |                           |
| <i>Dasypus novemcinctus</i> (Linnaeus, 1758) – Nine-banded armadillo, “tatu galinha”                           | Thrombosis, insects bite, scorpions bite, edema, asthma, deafness, earache, evil eye                                                                           | 11,13,14,15, 47, 57       |
| <i>Euphractus sexcinctus</i> (Linnaeus, 1758) – Six-banded armadillo “tatu peba”                               | Wounds, earache, evil eye, asthma, sore throat, pneumonia, sinusitis, deafness, coarse throat                                                                  | 11,13,14, 15,46, 47,59,60 |
| <i>Tolypeutes tricinctus</i> (Linnaeus, 1758) <sup>VU/IB</sup> – Brazilian three-banded armadillo, “tatu-bola” | Thrombosis, rheumatism                                                                                                                                         | 46,47                     |
| Dasyproctidae                                                                                                  |                                                                                                                                                                |                           |
| <i>Dasyprocta prymnolopha</i> Wagler, 1831 – Black-rumped agouti, “Cutia”                                      | Asthma, thrombosis                                                                                                                                             | 57                        |
| Delphinidae                                                                                                    |                                                                                                                                                                |                           |
| <i>Sotalia fluviatilis</i> Gervais & Deville, 1853) <sup>DD/I</sup> – Gray dolphin, gray river dolphin, “boto” | Asthma, headache, rheumatism, hernia, womb disorders, sore throat, injuries caused by the spines of the ‘arraia’, swelling, haemorrhoids inflammation, wounds, | 11,13,15                  |

|                                                                                                 |                                                                                                                                                                                                                    |                                                    |
|-------------------------------------------------------------------------------------------------|--------------------------------------------------------------------------------------------------------------------------------------------------------------------------------------------------------------------|----------------------------------------------------|
|                                                                                                 | earache, erysipelas, athlete's foot, tumour, cancer                                                                                                                                                                |                                                    |
| <i>Sotalia guianensis</i> (P. J. Van Bénédén, 1864)<br>– Guianan river dolphin, “boto”          | Asthma, headache, rheumatism, hernia, womb disorders, sore throat, injuries caused by the spines of the ‘arraia’, swelling, haemorrhoids inflammation, wounds, earache, erysipelas, athlete's foot, tumour, cancer | 11,13,15                                           |
| <b>Didelphidae</b>                                                                              |                                                                                                                                                                                                                    |                                                    |
| <i>Didelphis albiventris</i> (Lund, 1840) – Common opossum, “timbú”                             | Boils                                                                                                                                                                                                              | 11,13,14,58,61                                     |
| <i>Didelphis marsupialis</i> (Linnaeus, 1758) – Southern opossum, “mucura”, “gambá”, “saruê”    | Acne, wounds, bronchitis, joint pain, stomach ache, rheumatism, diarrhoea, inflammation, erysipelas, pain in gestation, asthma, headache, toothache, earache, sore throat                                          | 11,13,14,15                                        |
| <b>Erethizontidae</b>                                                                           |                                                                                                                                                                                                                    |                                                    |
| <i>Coendou prehensilis</i> (Linnaeus, 1758) – Brazilian porcupine, “coandú”, “porco espinho”    | Bronchitis, thrombosis, epilepsy, stroke, abscesses, conjunctivitis, asthma                                                                                                                                        | 10, 11,12, 13,14, 15, 36, 37, 44, 48, 49, 57,60,61 |
| <b>Equidae</b>                                                                                  |                                                                                                                                                                                                                    |                                                    |
| <i>Equus asinus</i> Linnaeus, 1758 – Asino, ass, “jumento”                                      | Snake bite (antidote), whooping cough, asthma                                                                                                                                                                      | 11,13,14, 15, 44, 46,60                            |
| <i>Equus caballus</i> (Linnaeus, 1758) – Horse, “cavalo”                                        | Cough, deep cuts; dermatosis, wounds                                                                                                                                                                               | 46,47                                              |
| <b>Felidae</b>                                                                                  |                                                                                                                                                                                                                    |                                                    |
| <i>Felis silvestris</i> Schreber, 1775 – Domestic cat, “gato”                                   | Asthma                                                                                                                                                                                                             | 46, 47,61                                          |
| <b>Hydrochaeridae</b>                                                                           |                                                                                                                                                                                                                    |                                                    |
| <i>Hydrochaeris hydrochaeris</i> (Linnaeus, 1766) – Capybara, “capibara”, “capivara”            | Thrombosis, conjunctivitis, venereal disease, rheumatism, earache, strengthen bones, liver pain, bronchitis, asthma, wounds, erysipelas, cough                                                                     | 11,13, 15, 36, 37, 46, 49,57, 58,61                |
| <b>Iniidae</b>                                                                                  |                                                                                                                                                                                                                    |                                                    |
| <i>Inia geoffrensis</i> (Blainville, 1817) <sup>VU/II</sup> – Amazon river dolphin, “boto rosa” | Asthma, headache, rheumatism, hernia, womb disorders, sore throat, injuries caused by the spines of the ‘arraia’, swelling, haemorrhoids inflammation, wounds,                                                     | 11,13                                              |

|                                                                                                          |                                                                                   |                                  |
|----------------------------------------------------------------------------------------------------------|-----------------------------------------------------------------------------------|----------------------------------|
|                                                                                                          | earache, erysipelas, athlete's foot, tumour, cancer                               |                                  |
| Leporidae                                                                                                |                                                                                   |                                  |
| <i>Sylvilagus brasiliensis</i> (Linnaeus, 1758) – Forest rabbit, tapeti, “coelho”, “coelho-do-mato”      | Thrombosis, conjunctivitis, boils, burns                                          | 11,13,14, 46, 57,61              |
| Mustelidae                                                                                               |                                                                                   |                                  |
| <i>Conepatus semistriatus</i> (Boddaert, 1785) – Striped hog-nosed skunk, “cangambá”, “gambambá”, tacaca | Rheumatism                                                                        | 46,47, 60,62                     |
| <i>Conepatus chinga</i> (Molina, 1782) – Gambá, Molina's Hog-nosed Skunk                                 | Thrombosis, Rheumatism                                                            | 61                               |
| <i>Lontra longicaudis</i> (Olfers, 1818) <sup>DD/I</sup> – “Lontra”, Neotropical Otter                   | Thrombosis                                                                        | 46                               |
| Myrmecophagidae                                                                                          |                                                                                   |                                  |
| <i>Myrmecophaga tridactyla</i> Linnaeus, 1758 <sup>VU/II/IB</sup> – Giant anteater, “tamanduá-bandeira”  | Thrombosis, stroke                                                                | 44, 46, 47                       |
| <i>Myrmecophaga tetradactyla</i> (Linnaeus, 1758) – Collared anteater, “tamanduá”                        | Edema, thrombosis                                                                 | 11,13,14, 57, 61,62              |
| Procyonidae                                                                                              |                                                                                   |                                  |
| <i>Nasua nasua</i> (Linnaeus, 1766) <sup>III</sup> – South American coati, “coati”, “quati”              | Sexual impotence, wounds, skin burns, snake bites, backache                       | 11,12 ,13,14, 36, 37, 46, 49, 48 |
| <i>Procyon cancrivorus</i> (G. [Baron] Cuvier, 1798) – Crab-eating raccoon, “guaxinim”                   | Rheumatism, epilepsy, thrombosis, snake bite                                      | 11,13,14, 15, 49, 57,61          |
| Physeteridae                                                                                             |                                                                                   |                                  |
| <i>Physeter catodon</i> Linnaeus, 1758 <sup>VU/I/II/IB</sup> – Sperm whale, cachelot, “cachalote”        | Asthma, backache, rheumatism, sore throat, wounds                                 | 11,13,14, 15,50                  |
| Suidae                                                                                                   |                                                                                   |                                  |
| <i>Sus scrofa</i> (Linnaeus, 1758) – Wild boar, “porco”                                                  | Acne, boils, tumours, asthma, Athlete's foot, berne, wounds                       | 11,13,14, 44, 46, 47, 44,59,61   |
| Tapiridae                                                                                                |                                                                                   |                                  |
| <i>Tapirus terrestris</i> (Linnaeus, 1758) <sup>VU/II</sup> – Brazilian tapir, “anta”                    | Rheumatism, arthrosis, osteoporosis, bursitis, muscular pain, asthma, tonsillitis | 11,15                            |
| Tayassuidae                                                                                              |                                                                                   |                                  |
| <i>Pecari tajacu</i> Linnaeus 1758 <sup>II/III</sup> – Collared peccary, “porco-do-mato”, “caititu”      | Thrombosis, bronchitis, stroke                                                    | 11,15, 44, 46,61                 |

|                                                                                                                     |                                                                                                                                                                                                                                                           |                        |
|---------------------------------------------------------------------------------------------------------------------|-----------------------------------------------------------------------------------------------------------------------------------------------------------------------------------------------------------------------------------------------------------|------------------------|
| <i>Tayassu pecari</i> (Link, 1795) <sup>II</sup> – White-lipped peccary “porco-do-mato”, “queixada”<br>Trichechidae | Thrombosis, stroke                                                                                                                                                                                                                                        | 44, 46                 |
| <i>Trichechus inunguis</i> (Natterer, 1883) <sup>VU/1/IB</sup> – Amazonian manatee, “peixe-boi”                     | Sprains, vaginal discharge, injuries caused by bang, burns, asthma, menstrual cramps, rheumatism, sore throat, wounds, muscle strain, suck a splinter out of skin or fresh, tumour, backache, hernia, arthrosis, luxation, menstrual cramps, insects bite | 11,12, 13,14,15, 46,48 |
| <i>Trichechus manatus</i> (Linnaeus, 1758) <sup>CR/1/IB</sup> – Manatee, “peixe-boi”                                | Sprains, vaginal discharge, injuries caused by bang, burns, asthma, menstrual cramps, rheumatism, sore throat, wounds, muscle strain, suck a splinter out of skin or fresh, tumour, backache hernia, arthrosis, luxation, menstrual cramps, insects bite  | 11,12, 13,14,15, 46,48 |

---

Categories of IUCN Red List: CR – Critically endangered, EN – Endangered, VU – Vulnerable, – Lower risk, DD – Deficient data and NE - Note Evaluated  
CITES Appendix (I, II and III)  
IN – Anexo 2 – Instrução Normativa n. 5/2004/MMA  
IB - Brazil’s official list of endangered species
